# Supplementary material for: Chitosan derived nitrogen-doped carbon dots suppress osteoclastic osteolysisviadownregulating ROS
Source: Royal Society of Chemistry journal article supplement (doi:10.1039/d0nr02848g), 2020-01-01
Supplement: d0nr02848g1.pdf [file d0nr02848g1.pdf]

## Supporting Information

### **Chitosan derived nitrogen-doped carbon dots suppress osteoclastic osteolysis *via* downregulating ROS**

Runfeng Chen<sup>a, 1</sup>, Guanxiong Liu<sup>b, 1</sup>, Xiaochen Sun<sup>a</sup>, Xiankun Cao<sup>d</sup>, Wenxin He<sup>d</sup>, Xixi Lin<sup>a</sup>,  
Qian Liu<sup>a</sup>, Jinmin Zhao<sup>a</sup>, Yichuan Pang<sup>e, \*</sup>, Baoqiang Li<sup>b, c, \*</sup>, An Qin<sup>a, d, \*</sup>

a. Guangxi Key Laboratory of Regenerative Medicine, Guangxi Medical University, Guangxi, 530021, China

b. Institute for Advanced Ceramics; State Key Laboratory of Urban Water Resource and Environment, Harbin Institute of Technology, Harbin 150001, China

c. Key Laboratory of Advanced Structural-Functional Integration Materials & Green Manufacturing Technology. Harbin Institute of Technology, Harbin 150001, China

d. Shanghai Key Laboratory of Orthopaedic Implants, Department of Orthopaedics, Ninth People's Hospital, Shanghai Jiao Tong University School of Medicine, Shanghai 200011, China

e. Department of Oral Surgery, Shanghai Key Laboratory of Stomatology, National Clinical Research Center of Stomatology, Ninth People's Hospital, Shanghai Jiao Tong University School of Medicine, Shanghai 200011, China

\*Corresponding authors.

*E-mail addresses:* pangyichuan@hotmail.com (Y.C Pang),

libq@hit.edu.cn (B.Q Li),

dr\_qinan@163.com (A. Qin).

<sup>1</sup> Runfeng Chen and Guanxiong Liu contributed equally to this work.

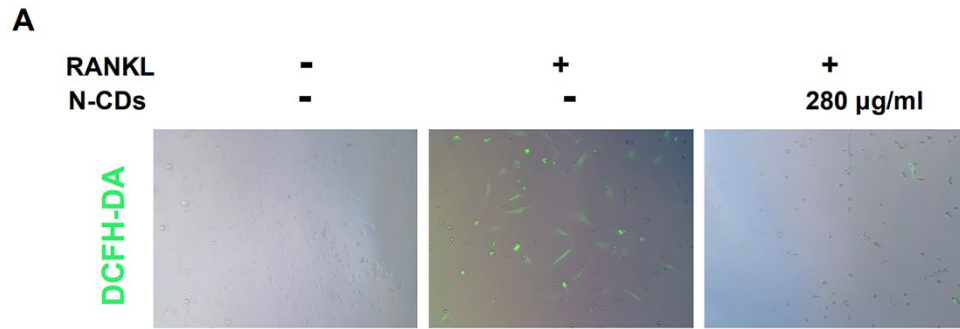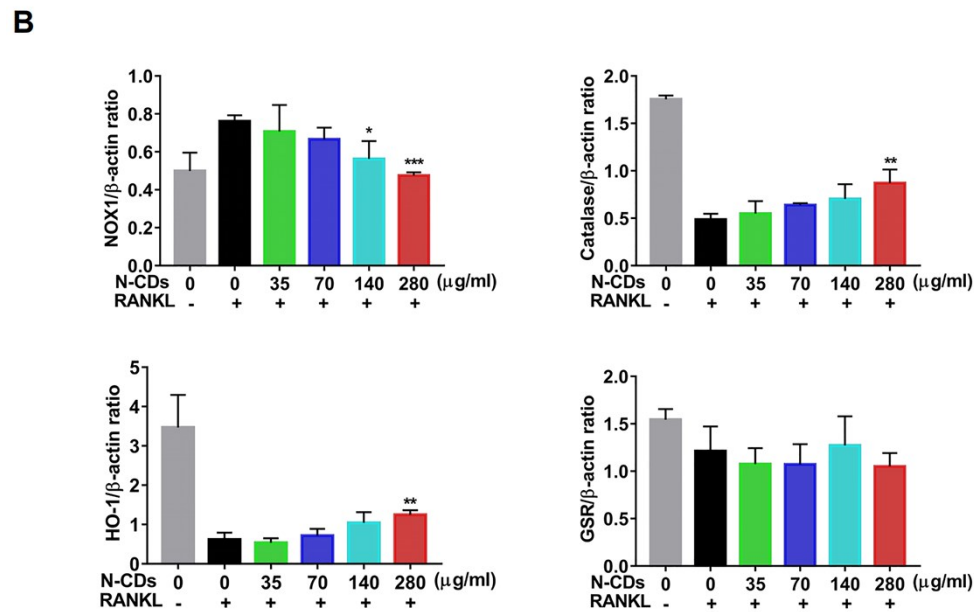

**S1. N-CDs downregulated ROS.** (A) BMMs were treated with or without N-CDs for 48 hours, and then intracellular reactive oxygen species (ROS) was detected by DCFH-DA. (B) The quantification of the band intensity of NOX1, Catalase, HO-1, and GSR relative to the ratio of  $\beta$ -actin (n=3). All experimental data were expressed as mean  $\pm$  SD. \*\*\*P < 0.001, \*\*P < 0.01, \*P < 0.05.

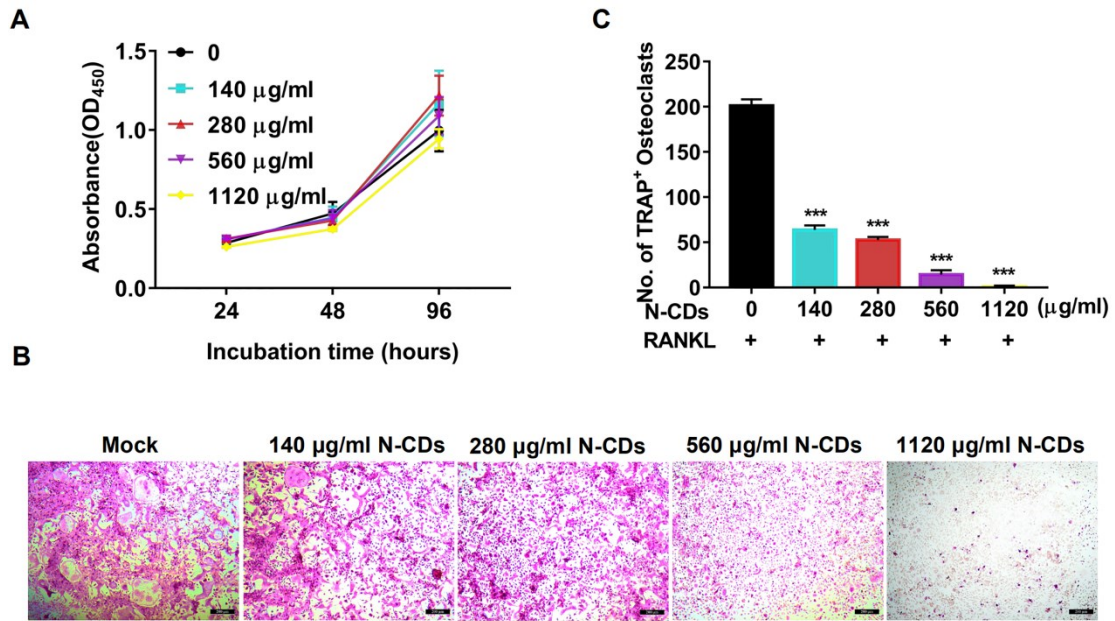

**S2. N-CDs inhibited BMMs differentiation.** (A) MTS assay was used to detect the cell activity of BMMs after treatment with N-CDs for 24 hours, 48 hours and 96 hours. (B) TRAP staining of BMMs treated with N-CDs, 30 ng/ml M-CSF and 50 ng/ml RANKL for 5 days. (C) Quantitative analysis of TRAP positive multinucleated cells (nucleus > 3). All experimental data were expressed as mean  $\pm$  SD (n=3). \*\*\*P < 0.001, \*\*P < 0.01, \*P < 0.05.

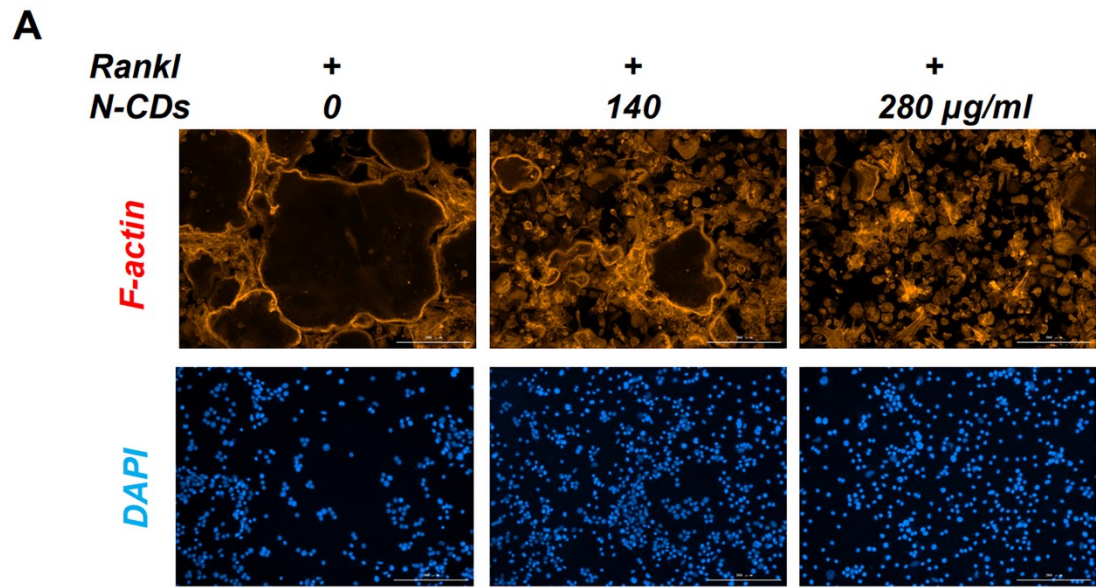

**S3. N-CDs suppressed OCs formation.** (A) Representative images of F-actin and nuclear staining of OCs.

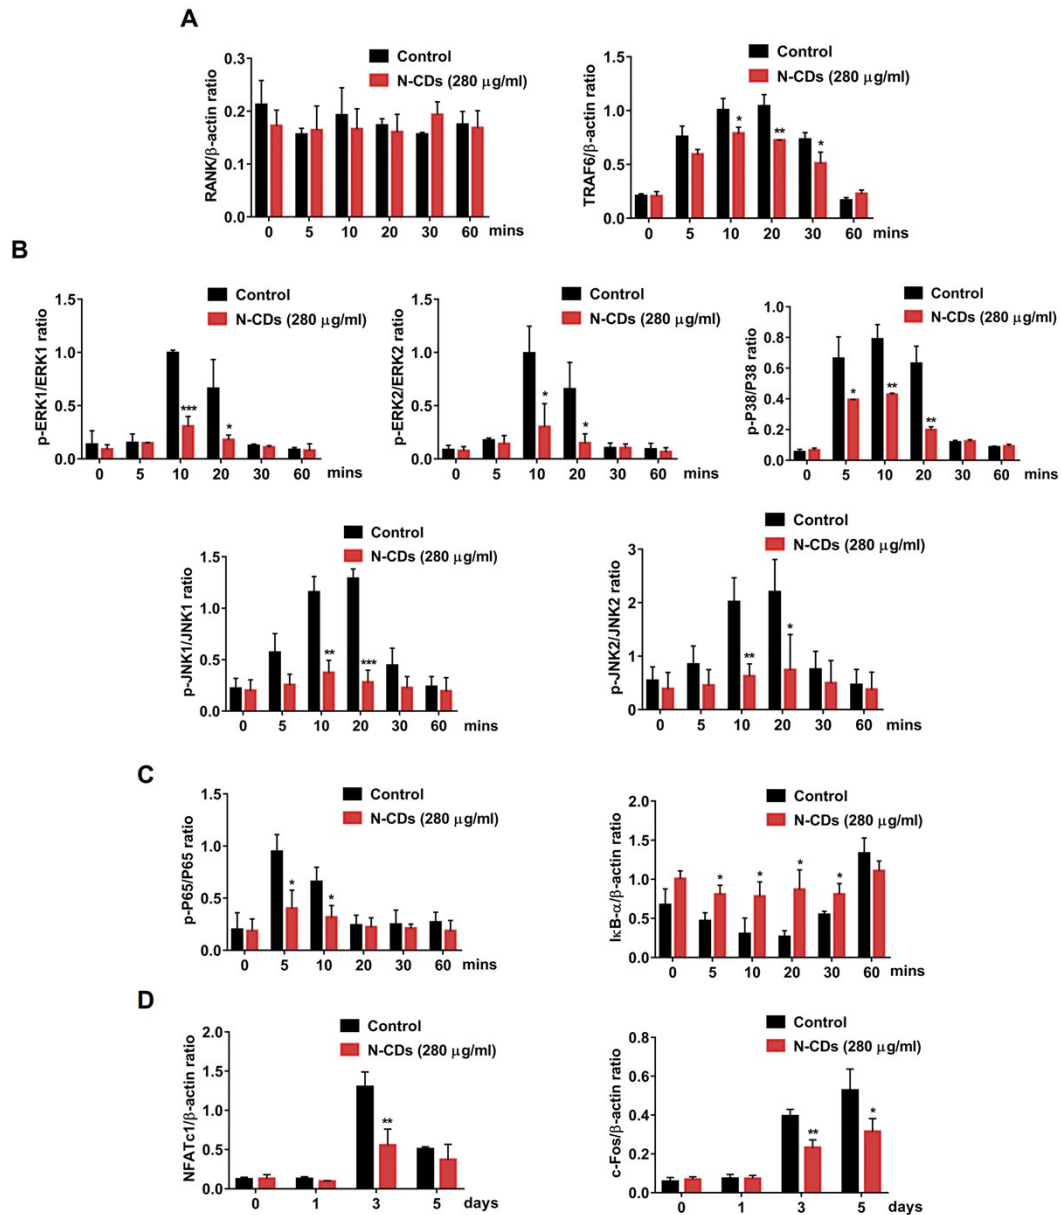

**S4. N-CDs suppressed ROS downstream signaling pathway.** (A) The ratio of band intensity of RANK and TRAF6 to  $\beta$ -actin ( $n=3$ ) was quantitatively analyzed. (B) The ratios of band intensity of p-ERK, p-p38, and p-JNK to ERK, p38 and JNK ( $n=3$ ), respectively, were quantitatively analyzed. (C) Quantitative analysis of the ratio of band intensity of p-p65 and I $\kappa$ B- $\alpha$  to p65 and  $\beta$ -actin ( $n=3$ ). (D) The ratio of band intensity of NFATc1 and c-Fos to  $\beta$ -actin ( $n=3$ ) was quantitatively analyzed. All experimental data were expressed as mean  $\pm$  SD. \*\*\* $P < 0.001$ , \*\* $P < 0.01$ , \* $P < 0.05$ .

**A**

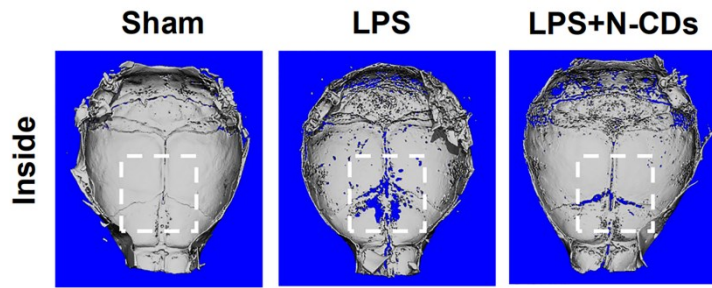

**S5. N-CDs prevented calvarial LPS induced osteoclastic bone loss. (A)** The representative  $\mu$ CT images of the inside of calvarials of each group were reconstructed.

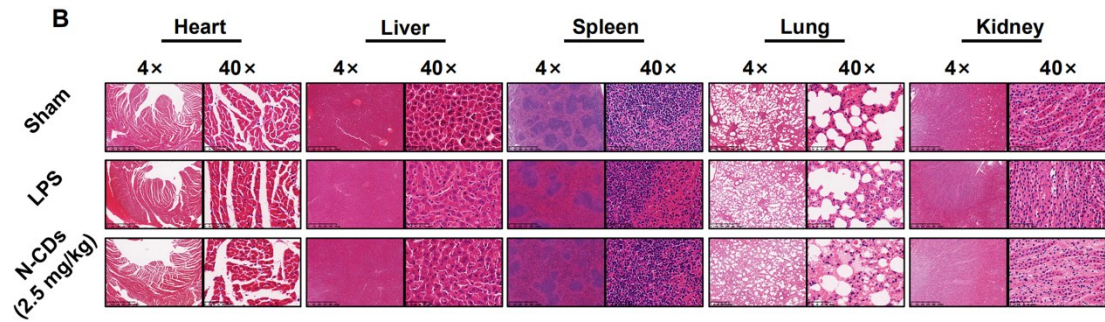

**S5. N-CDs prevented calvarial LPS induced osteoclastic bone loss. (B)** Representative images of hematoxylin and eosin staining of heart, liver, spleen, lung and kidney.

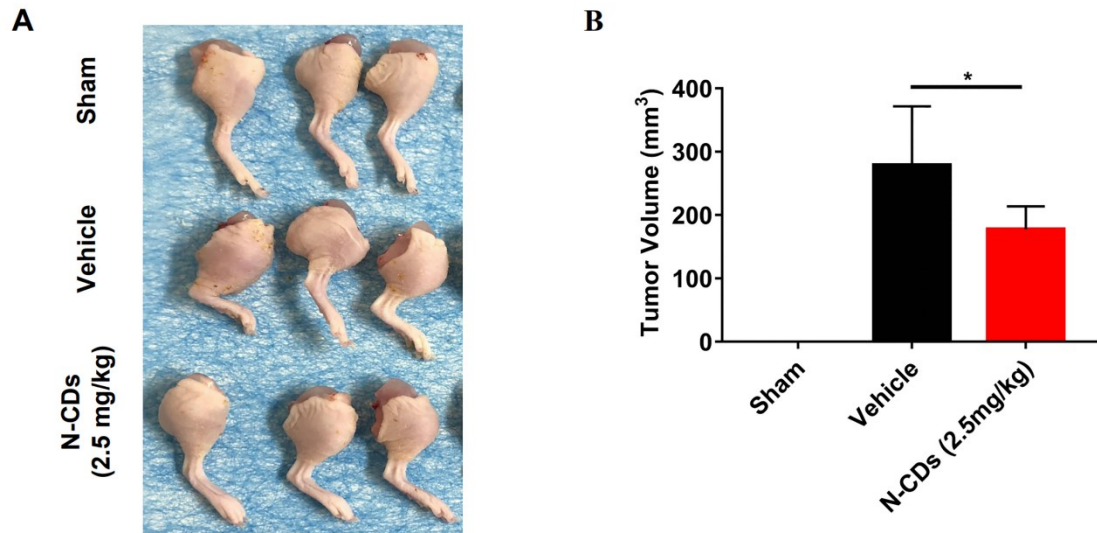

**S6. N-CDs prevented breast cancer induced osteolysis.** (A) Representative image of MDA-MB-231 cells injected into bone marrow cavity of tibia of nude mice (n=6). (B) Quantification of tumor volume in each group of nude mice. All experimental data were expressed as mean  $\pm$  SD. \*P < 0.05.



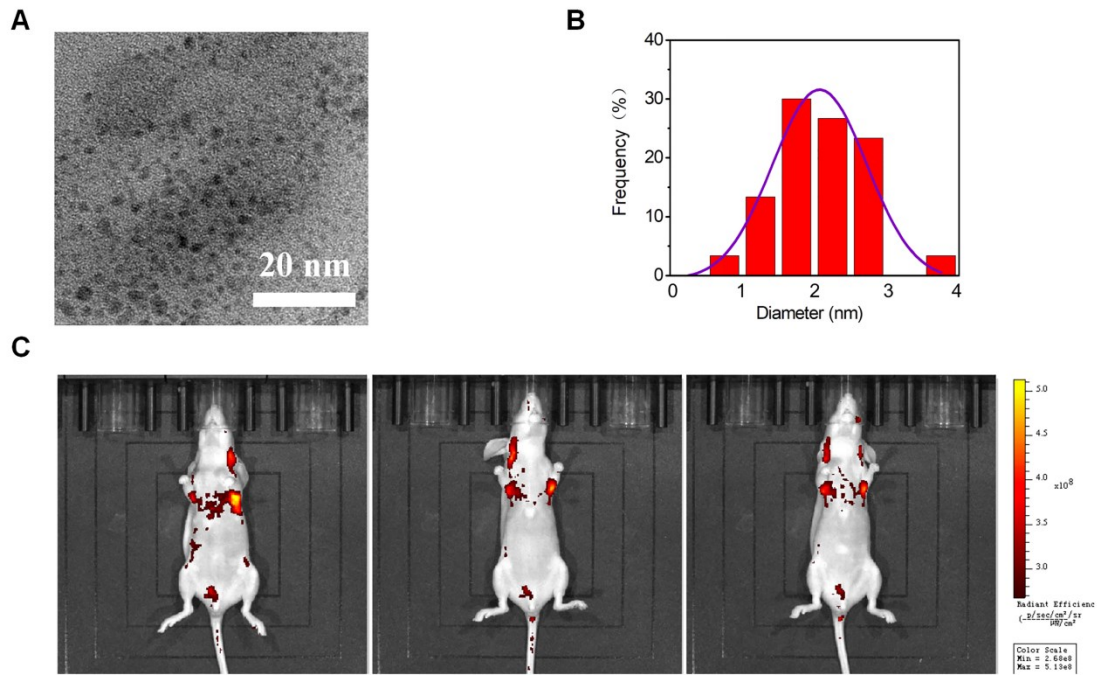

**S7. Size and *in vivo* fluorescence characterization of N-CDs.** (A) TEM image of the N-CDs. (B) N-CDs with size distribution histogram. (C) *In vivo* fluorescence images of nude mice injected with 100ul N-CDs (2.5 mg/kg) through tail vein. Images are taken every 30 minutes. The color bar represents the fluorescence intensity.

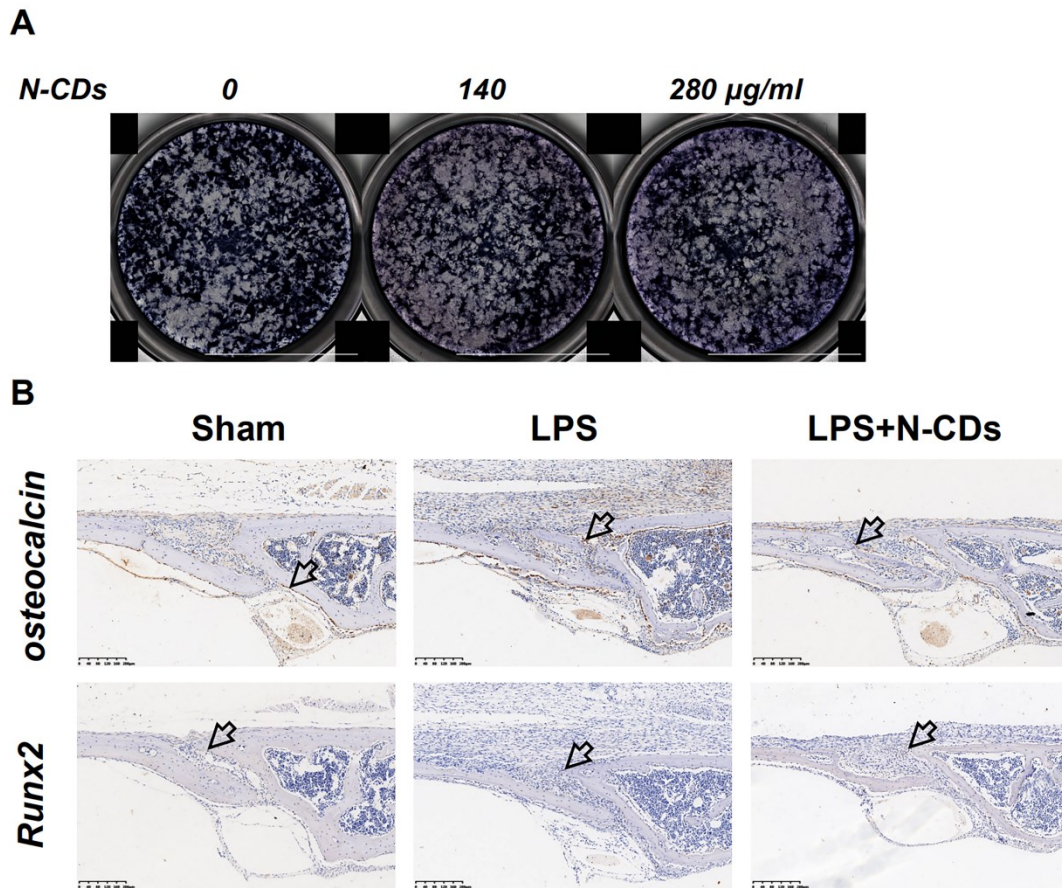

**S8. N-CDs had no effect on osteogenesis *in vitro* and *in vivo*.** (A) Representative ALP images of osteoblast culture treated with N-CDs. (B) Representative RUNX2 and osteocalcin images of immunohistochemical staining.
